# Supplementary material for: Electrogenerated chemiluminescence of Ru(bpy)32+at a black phosphorus quantum dot modified electrode and its sensing application
Source: Royal Society of Chemistry journal article supplement (doi:10.1039/c7an01617d), 2017-11-16
Supplement: c7an01617d1.pdf [file c7an01617d1.pdf]

## Supporting Materials

Electrogenerated chemiluminescence of Ru(bpy)<sub>3</sub><sup>2+</sup> at black phosphorus quantum dots modified electrode and its sensing application

*Lei Zhang<sup>a</sup>, KaiJin Tian<sup>a</sup>, YongPing Dong<sup>a,\*</sup>, HouCheng Ding<sup>a</sup>, ChengMing Wang<sup>b,\*</sup>*

a. School of Chemistry and Chemical Engineering, Hexian Development Institute of Chemical Industry, Anhui University of Technology, Maanshan, China, 243002

b. Hefei National Laboratory for Physical Science at the Microscale, University of Science and Technology of China, Hefei, China, 230026

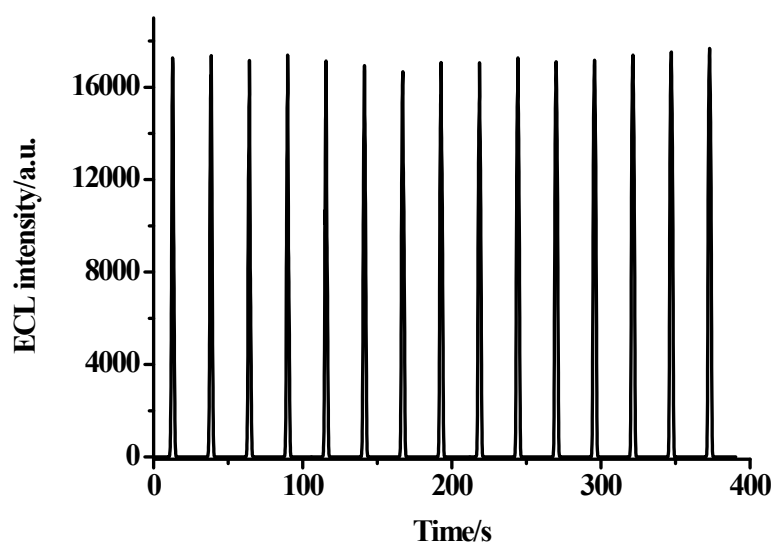

**Figure S1.** ECL emission of the modified electrode under continuous cyclic voltammetry for 15 cycles.

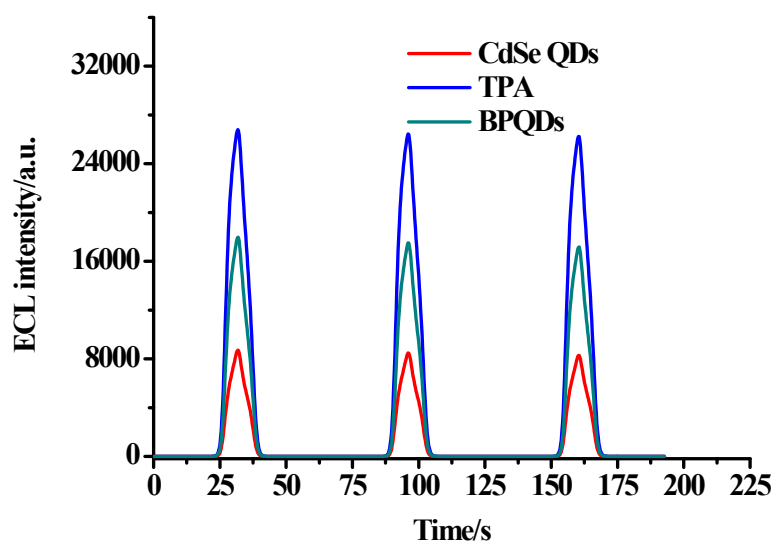

**Figure S2.** ECL profiles of  $\text{Ru}(\text{bpy})_3^{2+}$  with CdSe QDs, TPA, and BPQDs as coreactants.

**Table S1.** Results of analysis of DA in real samples.

| Samples             | Detected | Added | Found  | Recovery(%) | RSD(%) (n=5) |
|---------------------|----------|-------|--------|-------------|--------------|
| Diluted<br>Sample 1 | 30 nM    | 10nM  | 40.5nM | 105         | 3.2          |
| Diluted<br>Sample 2 | 10nM     | 10nM  | 19.8nM | 98          | 4.5          |
